# Supplementary material for: Crystallization, rheology and mechanical properties of the blends of poly(l-lactide) with supramolecular polymers based on poly(d-lactide)–poly(ε-caprolactone-co-δ-valerolactone)–poly(d-lactide) triblock copolymers
Source: Royal Society of Chemistry journal article supplement (doi:10.1039/c9ra04283k), 2019-01-01
Supplement: c9ra04283k1.pdf [file c9ra04283k1.pdf]

### Supporting Information

**Table S1** Thermal parameters of PDLA-PCVL-PDLA triblock copolymers and the corresponding supramolecular polymers derived from DSC scans

**Table S2** Thermal parameters of PLLA/supramolecular polymer blends derived from DSC scans

**Fig. S1** XRD patterns of PLLA/SMP blends: (a) PLLA/SMP0.49; (b) PLLA/SMP1.04

**Fig. S2** Variation of storage modulus ( $G'$ ) and loss modulus ( $G''$ ) as function of frequency for the neat PLLA melted at 175°C

**Fig. S3** Variation of loss tangent ( $\tan\delta$ ) as function of frequency for the neat PLLA melted at 175°C

**Fig. S4** Variation of complex viscosity ( $\eta^*$ ) as function of frequency for the neat PLLA melted at 175°C

**Table S1** Thermal parameters of PDLA-PCVL-PDLA triblock copolymers and the corresponding supramolecular polymers derived from DSC scans

| Sample             | Cooling       |                                             |                                         |                                             | Re-heating |                                         |                                             |               |                                             |               |                                             |
|--------------------|---------------|---------------------------------------------|-----------------------------------------|---------------------------------------------|------------|-----------------------------------------|---------------------------------------------|---------------|---------------------------------------------|---------------|---------------------------------------------|
|                    | $T_{c, PCVL}$ | $\Delta H_c$                                | $T_{c, PDL}$                            | $\Delta H_c$                                | $T_g$      | $T_{cold, PCV}$                         | $\Delta H_{cold}$                           | $T_{m, PCVL}$ | $\Delta H_m$                                | $T_{m, PDLA}$ | $\Delta H_m$                                |
|                    | (°C)          | $\begin{matrix} PCVL \\ (J/g) \end{matrix}$ | $\begin{matrix} A \\ (°C) \end{matrix}$ | $\begin{matrix} PDLA \\ (J/g) \end{matrix}$ | (°C)       | $\begin{matrix} L \\ (°C) \end{matrix}$ | $\begin{matrix} PCVL \\ (J/g) \end{matrix}$ | (°C)          | $\begin{matrix} PCVL \\ (J/g) \end{matrix}$ | (°C)          | $\begin{matrix} PDLA \\ (J/g) \end{matrix}$ |
| PDLA-PCVL-PDLA0.49 | 3.8/11.6      | 47.3                                        | —                                       | —                                           | —          | —                                       | —                                           | 30.2/35.4     | 46.7                                        | —             | —                                           |
| PDLA-PCVL-PDLA1.04 | 7.9           | 30.1                                        | 72.4                                    | 8.9                                         | —          | —                                       | —                                           | 29.2/34.7     | 30.0                                        | 108.9/127.9   | 8.7                                         |
| SMP0.49            | -16.3         | 11.6                                        | —                                       | —                                           | -54.1      | -12.9                                   | 24.6                                        | 28.9          | 38.5                                        | —             | —                                           |
| SMP1.04            | —             | —                                           | —                                       | —                                           | -45.6      | —                                       | —                                           | —             | —                                           | 117.3         | 3.3                                         |

Notes:  $T_{c, PCVL}$  and  $T_{c, PDLA}$  denote the crystallization temperatures of PCVL and PDLA blocks in the cooling run, respectively;  $\Delta H_{c, PCVL}$  and  $\Delta H_{c, PDLA}$  represent the crystallization enthalpy of PCVL and PDLA block in the cooling run;  $T_g$  represents the glass transition temperature;  $T_{cold, PCVL}$  and  $\Delta H_{cold, PCVL}$  are cold crystallization temperature and cold crystallization enthalpy of PCVL block in heating run, respectively;  $T_{m, PCVL}$  and  $T_{m, PDLA}$  are melting temperatures of PCVL and PDLA blocks, respectively;  $\Delta H_{m, PCVL}$  and  $\Delta H_{m, PDLA}$  are the melting enthalpy of PCVL and PDLA blocks in the heating run.

**Table S2** Thermal parameters of PLLA/supramolecular polymer blends derived from DSC scans

| Sample           | Cooling             |                                            |                     |                                            | Re-heating            |                                               |               |                        |                                               |                     |                                            |                     |                             | $X_{c, PLLA}$<br>(%) |
|------------------|---------------------|--------------------------------------------|---------------------|--------------------------------------------|-----------------------|-----------------------------------------------|---------------|------------------------|-----------------------------------------------|---------------------|--------------------------------------------|---------------------|-----------------------------|----------------------|
|                  | $T_{c, hc}$<br>(°C) | $\Delta H_{c, h}$<br><sup>c</sup><br>(J/g) | $T_{c, sc}$<br>(°C) | $\Delta H_{c, s}$<br><sup>c</sup><br>(J/g) | $T_{m, PCVL}$<br>(°C) | $\Delta H_{m, PCVL}$<br><sup>L</sup><br>(J/g) | $T_g$<br>(°C) | $T_{cold, hc}$<br>(°C) | $\Delta H_{cold, h}$<br><sup>c</sup><br>(J/g) | $T_{m, hc}$<br>(°C) | $\Delta H_{m, h}$<br><sup>c</sup><br>(J/g) | $T_{m, sc}$<br>(°C) | $\Delta H_{m, sc}$<br>(J/g) |                      |
| PLLA             | 99.4                | 7.4                                        | —                   | —                                          | —                     | —                                             | 60.0          | 112.2                  | 24.5                                          | 161.6/166.9         | 35.6                                       | —                   | —                           | 11.9                 |
| PLLA/SMP0.49-10% | 99.3                | 0.5                                        | —                   | —                                          | 30.5                  | 3.2                                           | 59.8          | 113.3                  | 29.3                                          | 162.5/169.1         | 29.6                                       | —                   | —                           | 0.4                  |
| PLLA/SMP0.49-30% | —                   | —                                          | —                   | —                                          | 29.9                  | 5.3                                           | 58.9          | 112.9                  | 21.3                                          | 161.0/167.9         | 21.3                                       | 181.2               | 0.4                         | 0                    |
| PLLA/SMP0.49-50% | —                   | —                                          | —                   | —                                          | 29.8                  | 11.3                                          | 58.6          | 114.5                  | 16.3                                          | 161.7/168.7         | 16.0                                       | 183.0               | 0.7                         | 0                    |
| PLLA/SMP1.04-10% | 96.5                | 2.4                                        | 137.6               | 1.1                                        | —                     | —                                             | 58.7          | 112.2                  | 18.9                                          | 161.0/166.9         | 23.8                                       | 182.0               | 0.3                         | 5.8                  |
| PLLA/SMP1.04-30% | 98.6                | 8.5                                        | 141.0               | 1.8                                        | 27.9                  | 0.8                                           | 58.7          | 109.8                  | 9.6                                           | 160.2/166.0         | 22.6                                       | 182.3               | 1.3                         | 19.8                 |
| PLLA/SMP1.04-50% | 110.1               | 12.9                                       | 142.8               | 4.8                                        | 26.5/33.2             | 9.0                                           | —             | —                      | —                                             | 156.0/164.3         | 13.7                                       | 183.3               | 3.8                         | 29.2                 |

Notes:  $T_{c, hc}$  and  $T_{c, sc}$  denote the crystallization temperatures of homo-crystallization and stereocomplex crystallization in the cooling run, respectively;  $\Delta H_{c, hc}$  and  $\Delta H_{c, sc}$  represent the crystallization enthalpy of homo-crystallization and stereocomplex crystallization in the cooling run, respectively;  $T_{m, PCVL}$  and  $\Delta H_{m, PCVL}$  are melting temperature and melting enthalpy of PCVL block, respectively;  $T_g$  represents the glass transition temperature;  $T_{cold, hc}$  and  $\Delta H_{cold, hc}$  are cold crystallization temperature and cold crystallization enthalpy of homo-crystallization in heating run, respectively;  $T_{m, hc}$  and

$T_{m,sc}$  are melting temperatures of homo-crystallized PLLA and stereocomplex in the heating run, respectively;  $\Delta H_{m,hc}$  and  $\Delta H_{m,sc}$  are the melting enthalpy of homo-crystallized PLLA and stereocomplex; respectively;  $X_{c,PLLA}(\%) = (\Delta H_{m,hc} - \Delta H_{cold,hc}) / ([1-P] \times \Delta H_{m,PLLA}^0)$ ,  $\Delta H_{m,PLLA}^0 = 93.6 \text{ J/g}$ , P denotes the mass fraction of supramolecular polymer in the blends.

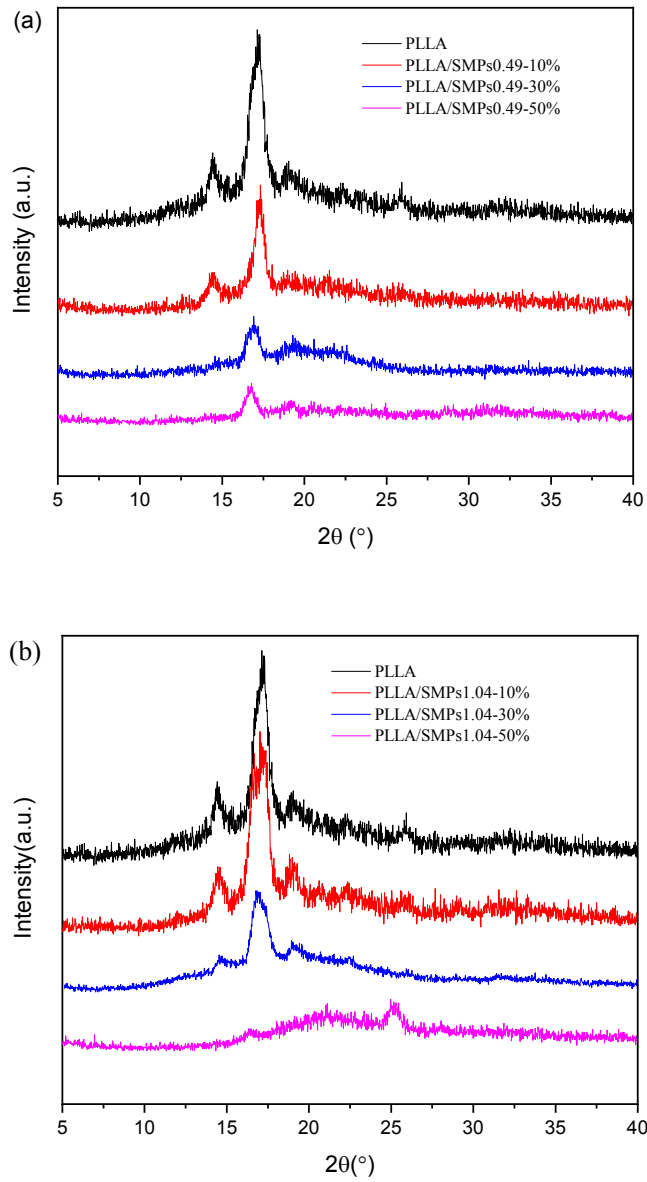

**Fig. S1** XRD patterns of PLLA/SMPs blends: (a) PLLA/SMPs0.49; (b) PLLA/SMPs1.04

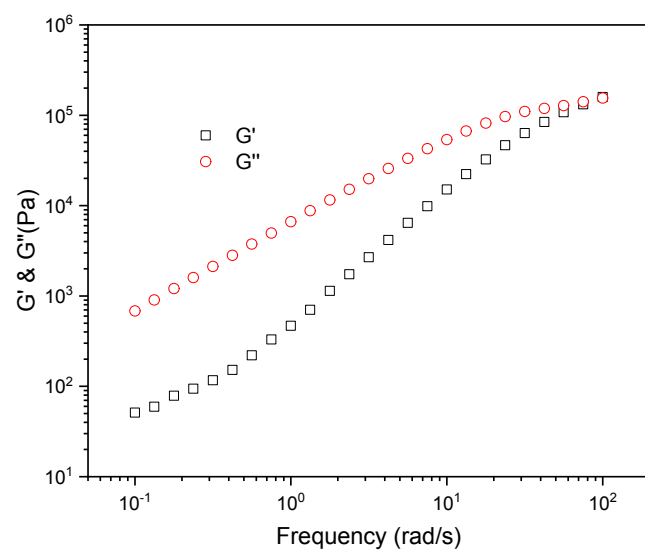

**Fig. S2** Variation of storage modulus ( $G'$ ) and loss modulus ( $G''$ ) as function of frequency for the neat PLLA melted at 175°C

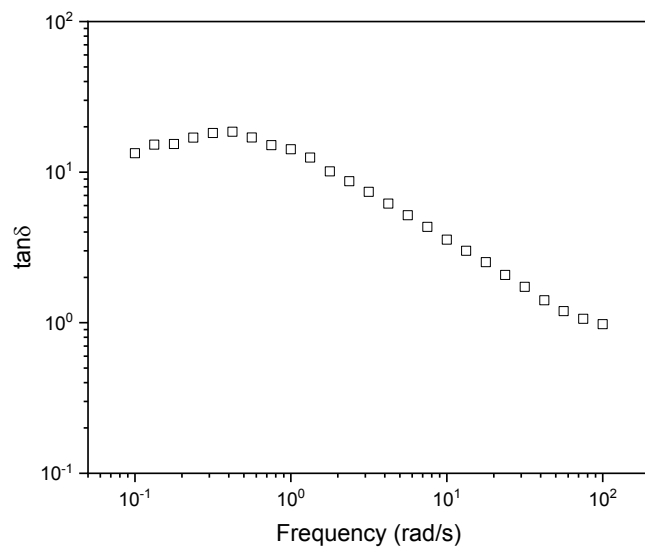

**Fig. S3** Variation of loss tangent ( $\tan\delta$ ) as function of frequency for the neat PLLA melted at 175°C

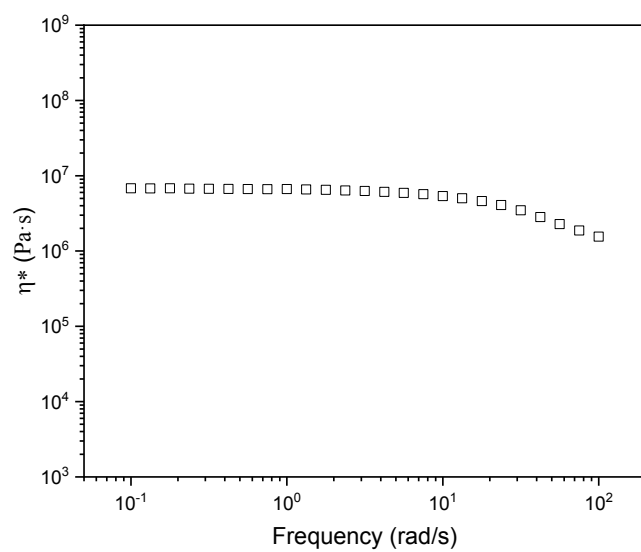

**Fig. S4** Variation of complex viscosity ( $\eta^*$ ) as function of frequency for the neat PLLA melted at 175°C
